# Supplementary material
Source: PubMed Central journal article supplement (PMC3387422)
Supplement: supp_jc.2011-3131_11-3131_SuppTable_1.pdf [file supp_jc.2011-3131_11-3131_SuppTable_1.pdf]

**Supplemental Table 1.** Primers used in the qPCR.

| <b>Gene</b> | <b>Sequence (5'→3')</b>        | <b>Amplicon (bp)</b> |
|-------------|--------------------------------|----------------------|
| HIF1A       | ACC ATC AGC TAT TTG CGT GTG AG | 138 bp               |
| HIF1A       | GTC ACC ATC ATC TGT GAG AAC C  |                      |
| VEGFA       | GTG CAT TGG AGC CTT GCC TTG    | 165 bp               |
| VEGFA       | GAA GAT GTC CAC CAG GGT CTC    |                      |
| MMP2        | CGA CAA GAA GTA TGG CTT CTG C  | 169 bp               |
| MMP2        | GTA GTT GGC TGT GGT CGC AC     |                      |
| EPHB4       | GAG CCT GTC AAT GTC ACC ACT G  | 156 bp               |
| EPHB4       | CCT TCT CAT GGT ATT TGA CCT CG |                      |
| TIMP2       | CTG TGA CTT CAT CGT GCC CTG    | 163 bp               |
| TIMP2       | TCT GTG ACC CAG TCC ATC CAG    |                      |
| EFNB2       | GGA AGA AGT TCG ACA ACA AGT CC | 166 bp               |
| EFNB2       | CAC CAG CGT GAT GAT GAT GAC    |                      |
| RPL19       | AGA CCC CAA TGA GAC CAA TG     | 129 bp               |
| RPL19       | GTG TTT TTC CGG CAT CGA GC     |                      |
